# Supplementary material for: Pharmacokinetics of table and Port red wine anthocyanins: a crossover trial in healthy men
Source: Royal Society of Chemistry journal article supplement (doi:10.1039/c7fo00329c), 2017-01-01
Supplement: c7fo00329c2.pdf [file c7fo00329c2.pdf]

Table 1. HPLC-MS/MS parameters for the identification of anthocyanins and anthocyanin metabolites in human plasma and urine samples reported in the literature.

| Anthocyanins (LC-MS) |                |                                                                                            | Anthocyanins source                                                                    | Previously described in |       |
|----------------------|----------------|--------------------------------------------------------------------------------------------|----------------------------------------------------------------------------------------|-------------------------|-------|
| Compound             | M <sup>+</sup> | MS <sup>2</sup>                                                                            |                                                                                        | Plasma                  | Urine |
| Dp3glc               | 465            | 303 (-162)                                                                                 | Grape/blueberry juice and smoothie<br>Red Grape Juice and Red Wine                     | 7, 16                   | 7, 16 |
| 4'-Me-Dp3glc         | 479            | 317 (-162)                                                                                 |                                                                                        |                         |       |
| Dp3glc-Glucr         | 641            | 465 (-176)<br>479 (-162)<br>303 (-176, -162)                                               |                                                                                        |                         |       |
| Dp3glc-Sulp          | 545            | 383 (-162)<br>303 (-162, -80)<br>465 (-80)                                                 |                                                                                        |                         |       |
| Dp3glc-diSulp        | 625            | 303 (162, -80, -80)                                                                        |                                                                                        |                         |       |
| Dp                   | 303            |                                                                                            |                                                                                        |                         |       |
| Dp-Me                | 317            | 303 (-14)                                                                                  |                                                                                        |                         |       |
| Dp-Glucr             | 479            | 303 (-176)                                                                                 |                                                                                        |                         |       |
| Dp-diGlucr           | 655            | 303 (-176, -176)                                                                           |                                                                                        |                         |       |
| Mv3glc               | 493            | 331 (-162)                                                                                 | Grape/blueberry juice and smoothie<br>Red Grape Juice and Red Wine<br>Red wine extract | 7, 9, 16                | 7, 16 |
| Mv3glc-Glucr         | 669            | 493 (-176)<br>507 (-162)<br>331 (-176, -162)                                               |                                                                                        |                         |       |
| Mv3glc-Sulp          | 573            | 493 (-80)<br>411 (-162)<br>331 (-162, -80)                                                 |                                                                                        |                         |       |
| Mv                   | 331            |                                                                                            |                                                                                        |                         |       |
| Mv-Glucr             | 507            | 331 (-176)                                                                                 | Grape/blueberry juice and smoothie<br>Red wine extract                                 | 9, 16                   | 16    |
| Mv-Sulp              | 411            | 331 (-80)                                                                                  |                                                                                        |                         |       |
| Mv3glc-Cum           | 639            | 331 (-162, -146)<br>493 (-146)                                                             |                                                                                        |                         |       |
| Mv3glc-Cum-Glucr     | 815            | 639 (-176)<br>669 (-146)<br>331 (-176, -146, -162)<br>507 (-146, -162)<br>493 (-176, -146) |                                                                                        |                         |       |
| Mv3glc-Cum-Sulp      | 719            | 573 (-146)<br>411 (-146, -162)<br>639 (-80)<br>331 (-146, -162, -80)                       |                                                                                        |                         |       |
| Mv3glc-Acet          | 535            | 331 (-162, -42)<br>493 (-42)                                                               |                                                                                        |                         |       |
| Mv3glc-Acet-Glucr    | 711            | 535 (-176)<br>493 (-176, -42)<br>331 (-176, -42, -162)<br>669 (-42)<br>507 (-42, -162)     |                                                                                        |                         |       |
| Mv3glc-Acet-Sulp     | 615            | 573 (-42)<br>411 (-42, -162)<br>535 (-80)<br>331 (-42, -162, -80)                          |                                                                                        |                         |       |

|                |     |                                              |                                                                                           |              |               |
|----------------|-----|----------------------------------------------|-------------------------------------------------------------------------------------------|--------------|---------------|
| Pt3glc         | 479 | 317 (-162)                                   | Grape/blueberry juice and smoothie<br>Red wine                                            | 7, 16        | 7, 16         |
| 5'-O-Me-Pt3glc | 493 | 331 (-162)                                   |                                                                                           |              |               |
| Pt3glc-Glucr   | 655 | 479 (-176)<br>493 (-162)<br>317 (-176, -162) |                                                                                           |              |               |
| Pt3glc-Sulp    | 559 | 479 (-80)<br>397 (-162)<br>317 (-162, -80)   |                                                                                           |              |               |
| Pt             | 317 |                                              |                                                                                           |              |               |
| Pt-Me          | 331 | 317 (-14)                                    |                                                                                           |              |               |
| Pt-Glucr       | 493 | 317 (-176)                                   |                                                                                           |              |               |
| Pt-Sulp        | 397 | 317 (-80)                                    |                                                                                           |              |               |
| Pn3glc         | 463 | 301 (-162)                                   | Grape/blueberry juice and smoothie<br>Red wine extract<br>Red cabbage                     | 7, 9, 16, 23 | 7, 16, 23, 24 |
| Pn3glc-Glucr   | 639 | 463 (-176)<br>477 (-162)<br>301 (-176, -162) |                                                                                           |              |               |
| Pn3glc-Sulp    | 543 | 463 (-80)<br>381 (-162)<br>301 (-162, -80)   |                                                                                           |              |               |
| Pn             | 301 | 286                                          | Red cabbage                                                                               |              | 23            |
| Pn-Glucr       | 477 | 301 (-176)                                   | Grape/blueberry juice and smoothie<br>Red wine extract<br>Elderberry or Blueberry extract | 9, 16        | 16, 24        |
| Pn-Sulp        | 381 | 301 (-80)                                    |                                                                                           |              |               |

diSulp, disulphate; Glucr, glucuronide; Me, methyl; Sulp, sulphate.
