# Supplementary material for: Pharmacokinetics of table and Port red wine anthocyanins: a crossover trial in healthy men
Source: Royal Society of Chemistry journal article supplement (doi:10.1039/c7fo00329c), 2017-01-01
Supplement: c7fo00329c3.pdf [file c7fo00329c3.pdf]

Table 2. Pharmacokinetic characteristics of plasma anthocyanins and anthocyanin metabolites over 120 min and urinary concentrations at 120 minutes, after the consumption of (A) 250 mL of table red wine and (B) 150 mL of Port wine.

| (A)                    |             | Table red wine |                    |                          |                 |                        |                                       |
|------------------------|-------------|----------------|--------------------|--------------------------|-----------------|------------------------|---------------------------------------|
|                        | Peak number | Pigment        | Ingested dose (mg) | C <sub>max</sub> (ng/mL) | AUC (ng/mL*min) | t <sub>max</sub> (min) | Conc. (at 120 min) μmol/mg creatinine |
| Native anthocyanins    | 1           | Dp3glc         | 11.10 ± 0.03       | -                        | -               | -                      | 0.016 ± 0.011                         |
|                        | 2           | Pt3glc         | 13.88 ± 0.23       | -                        | -               | -                      | 0.018 ± 0.005                         |
|                        | 3           | Pn3glc         | 22.04 ± 0.53       | 0.8 ± 0.0                | 69.8 ± 4.1      | 70 ± 4.1               | 0.031 ± 0.004                         |
|                        | 4           | Mv3glc         | 133.88 ± 3.26      | 5.3 ± 0.2                | 469.8 ± 27.4    | 67.5 ± 18.9            | 0.209 ± 0.026                         |
| Anthocyanin conjugates | 5           | DpGlucr        | -                  | 1.2 ± 0.3                | 82.3 ± 16.0     | >120                   | 0.014 ± 0.004                         |
|                        | 6           | PnGlucr        | -                  | 8.7 ± 1.3                | 616.3 ± 77.3    | 105 ± 15               | 0.156 ± 0.006                         |
|                        | 7           | MvGlucr        | -                  | 17.3 ± 0.0               | 1009.0 ± 268.6  | >120                   | 0.281 ± 0.067                         |

| (B)                    |             | Young Port red wine |                    |                          |                 |                        |                                       |
|------------------------|-------------|---------------------|--------------------|--------------------------|-----------------|------------------------|---------------------------------------|
|                        | Peak number | Pigment             | Ingested dose (mg) | C <sub>max</sub> (ng/mL) | AUC (ng/mL*min) | t <sub>max</sub> (min) | Conc. (at 120 min) μmol/mg creatinine |
| Native anthocyanins    | 2           | Pt3glc              | 2.21 ± 0.00        | -                        | -               | -                      | 0.006 ± 0.001                         |
|                        | 3           | Pn3glc              | 1.21 ± 0.02        | -                        | -               | -                      | 0.006 ± 0.002                         |
|                        | 4           | Mv3glc              | 24.36 ± 0.23       | 2.0 ± 0.6                | 159.1 ± 31.9    | 67.5 ± 18.9            | 0.043 ± 0.018                         |
| Anthocyanin conjugates | 6           | PnGlucr             | -                  | 0.6 ± 0.1                | 63.2 ± 13.3     | 75 ± 15                | 0.002 ± 0.001                         |
|                        | 7           | MvGlucr             | -                  | 4.1 ± 0.9                | 301.3 ± 66.5    | 105 ± 15               | 0.038 ± 0.006                         |

Values are presented as mean ± SEM (n=4). The non-parametric test Wilcoxon signed-rank, for paired samples, was used. No significant differences were observed between Port and table red wine, p> 0.05. Plasma concentrations of anthocyanins and anthocyanin metabolites were quantified by HPLC-DAD. Values were corrected to urinary creatinine values and expressed as ng/mg creatinine. 1, Dp3glc: delphinidin-3-O-glucoside; 2, Pt3glc: petunidin-3-O-glucoside; 3, Pn3glc: peonidin-3-O-glucoside; 4, Mv3glc: malvidin-3-O-glucoside; 5, DpGlucr: delphinidin-glucuronide, 6, PnGlucr: peonidin-glucuronide, and 7, MvGlucr: malvidin-glucuronide. AUC<sub>0-120</sub>, area under the curve (0-120 min); Glc, glucose; Glucr, glucuronide; C<sub>max</sub>, maximum plasma concentration; t<sub>max</sub>, time to reach maximum plasma concentration.
